# Supplementary material for: Plasticity in Single Axon Glutamatergic Connection to GABAergic Interneurons Regulates Complex Events in the Human Neocortex
Source: PLoS Biol. 2016 Nov 9;14(11):e2000237. doi: 10.1371/journal.pbio.2000237 (PMC5102409; doi:10.1371/journal.pbio.2000237)
Supplement: S2 Data — (XLSX) [file pbio.2000237.s008.xlsx]

## Sheet: Data Fig2A2
		Raw EPSP amplitude (mV), no binning, interval 10 s, baseline preceding 40 Hz burst is 5 min (30 stimulation cycles)
		Cell
		8.017
		8.0317
		6.886
		7.2146
		7.4092
		7.4745
		7.8655
		8.2986
		8.3186
		7.7131
		7.9177
		7.5791
		7.9711
		7.8681
		8.019
		7.5059
		7.1594
		7.948
		7.7267
		7.1033
		7.029
		7.8672
		7.6499
		8.6993
		7.5464
		8.006
		7.5912
		7.8791
		6.6156
		7.4566
	40 Hz stim.
		5.9794
		7.8047
		6.7634
		6.9279
		6.3329
		7.5594
		6.0536
		5.6105
		6.6922
		7.0418
		7.2319
		7.4364
		7.4858
		6.9386
		6.3244
		5.4815
		6.2292
		7.4698
		5.7183
		5.3845
		3.8413
		5.3174
		2.1786
		5.102
		3.2343
		5.1096
		4.0783
		2.9124
		2.8429
		3.0176
		5.3962
		5.2845
		4.2521
		5.7897
		3.7108
		2.5459
		3.0843
		3.4848
		5.5274
		4.6366
		4.4437
		4.2848
		4.4249
		3.3609
		2.3747
		4.8849
		4.5656
		3.7599
		3.4687
		1.7255
		5.1574
		3.144
		0.2518
		4.2742
		2.1173
		4.6277
		1.2538
		2.7423
		4.2926
		4.2508
		3.5813
		4.058
		3.2778
		1.8368
		4.0688
		4.9951
		3.6326
		2.6682
		3.5774
		3.1293
		3.6566
		2.3264
		4.0712
		2.9351
		3.8714
		3.1087
		3.9493
		2.5267
		2.9981
		3.5114
		2.2987
		3.3241
		2.416
		1.3685
		2.986
		0.8243
		2.8416
		3.4464
		3.4404
		1.1315
		3.8943
		2.4221
		2.5996
		4.2517
		3.4226
		2.1333
		1.7064
		2.6453
		2.6946
		2.0957
		3.5824
		2.8369
		2.7745
		2.2729
		1.7047
		2.2885
		1.2923
		1.643
		2.6949
		4.8743
		3.8703
		3.7116
		2.2058
		2.5448
		3.0741
		3.9502
		1.2467
		1.0401
		3.5493
		1.4153
		3.175
		1.861
		3.5913
		4.3132
		2.332
		2.3546
		1.5367
		3.1722
		2.9821
		1.1408
		1.8177
		1.0369
		2.2435
		2.7239
		1.6651
		3.7796
		4.9412
		1.2982
		2.6765
		2.9784
		2.1535
		0.7224
		2.9903
		3.5371
		4.332
		1.9937
		3.5778
		1.9907
		2.7639
		1.7941
		1.8805
		2.3015
		3.1003
		2.1502
		2.825
		2.2457
		1.5019
		3.5932
		2.587
		2.2069
		3.172
		2.6067
		2.9483
		2.8436
		0.641
		2.3624
		0.2743
		2.7016
		3.3062
		2.2913
		3.136
		3.414
		2.6438
		1.472
		5.5562
		2.3401
		2.1348
		2.0283
		0.6888
		1.6361
		2.9011
		1.503
		2.684
		0.9462
		1.4846
		0.9003
		1.6452
		1.1014
		3.8534
		1.8032
		3.2529
		2.111
		4.0519
		0.6369
		0.9759
		2.8955
		2.0186
		2.5812
		2.786
		2.7691
		2.5845
		1.8337
		2.6524
		0.286
		1.167
		2.4446
		3.5586
		0.5832
		1.6095
		3.9445
		2.3199
		3.3272
		2.6732
		2.4418
		2.3682
		2.426
		2.7851
		1.1389
		1.8344
		2.6996
		2.6037
		2.3232
		3.0977
		2.3546
		4.1446
		2.4873
		2.1009
		3.3254
		1.9024
		2.8643
		1.9634
		2.4494
		2.6011
		2.1656
		1.1886
		2.0621
		1.9511
		0.1279
		2.395
		0.87
		1.3008
		2.9206
		2.0851
		2.7009
		2.6771
		1.7943
		3.493
		1.8664
		3.6341
		2.5736
		1.3073
		3.1213
		2.3704
		2.5357
		1.845
		3.6068
		1.5391
		0.9226
		1.3419
		2.5667
		2.1781
		0.891
		1.1865
		1.3135
		1.7703
		1.5943
		1.4755
		0.8763
		0.9854
		2.0662
		0.807
		2.8921
		1.4592
		1.819
		1.5274
		3.7623
		1.2737
		1.0224
		0.3611
		2.7522
		2.4052
		2.3478
		0.7611
		1.083
		1.257
		1.3655
		1.575
		2.8873
		3.0092
		3.0789
		1.8612
		0.8351
		2.8585
		1.4222
		1.6458
		3.4417
		3.0302
		1.3027
		1.8759
		0.7234
		1.4285
		1.8058
		0.2548
		2.321
		2.5308
		1.3482
		0.7858
		1.1774
		0.4855
		1.7634
		2.9823
		2.0197
		1.7567
		0.7434
		0.5524
		1.8506
		1.2884
		1.7783
		3.1468
		3.28
		2.9739
		3.0397
		1.1828
		1.3213
		2.5169
		2.6059
		2.1686
		1.7723
		1.2096
		2.5048
		2.3232
		1.2365
		2.8784
		1.1761
		2.4141
		2.1623
		1.7697
		3.1135
		1.8818
		3.6092
		3.2575
		2.2626
		1.0274
		3.2174
		2.0238
		1.1341
		0.9291
		2.8509
		4.6366
		2.4069
		1.6315
		0.7219
		2.6953
		0.678
		1.9807
		2.447
		1.135
		1.1181
		2.6923
		3.3629
		1.1977
		0.4992
		0.1922
		1.3497
		2.5832
		1.7662
		0.573
		0.7652
		1.8998
		1.403
		1.6499
		1.7987
		1.136
		0.8484
		0.9375
		1.3633
		0.6501
		0.7685
		1.2179
		1.0865
		1.1062
		3.6491
		0.6938
		1.2605
		1.2934
		2.926
		2.2613
		2.4795
		1.914
		2.0543
		2.2043
		0.5983
		1.6084
		1.8307
		1.7175
		0.9839
		1.4333
		1.0475
		3.93
		1.2815
		2.4963
		1.5746
		0.9339
		0.9343
		0.297
		1.3462
		1.8409
		1.2369
		2.7141
		1.956
		1.6556
		2.3522
		3.5588
		1.2605
		1.7826
		3.1245
		1.0354
		1.4242
		0.5981
		2.0002
		1.6837
		1.0614
		1.2824
		1.6086
		3.3616
		3.0163
		0.8098
		0.9178
		1.6772
		1.2579
		1.4413
		2.3963
		0.5862
		2.7687
		0.7613
		2.0065
		1.0291
		0.9087
		1.3568
		1.051
		1.2616
		1.0728
		2.881
		1.6069
		1.8584
		1.8686
		2.2797
		1.7614
		1.0293
		2.6576
		1.4385
		0.77
		0.4851
		1.5034
		0.6031
		0.9598
		2.823
		0.9124
		1.6532
		2.3842
		1.1029
		2.4377
		2.1379
		1.1064
		0.415
		0.5024
		0.1262
		0.3197
		1.83
		0.4916
		2.16
		1.7229
		0.8949
		2.5656
		0.7455
		2.5518
		3.017
		2.1924
		2.4931
		0.6477
		1.4672
		0.718
		1.2622
		1.6606
		0.223
		2.0418
		0.8706
		1.382
		2.234
		2.6752
		0.9869
		3.3298
		2.1039
		1.2064
		1.0603
		0.4057
		0.7135
		0.4076
		1.7264
		0.7893
		2.3305
		1.3092
		0.6656
		1.0551
		1.6006
		1.9459
		1.9969
		1.3021
		0.4219
		0.6557
		2.8384

## Sheet: Data Fig2A3
		bl-normalized EPSP, no binning, interval 10 s, the baseline preceding 40 Hz burst is 5 min (30 stimulation cycles)
		Cell 1	Cell 2	Cell 3	Cell 4	Cell 5
		1.0788	0.9906	1.2705	1.0434	0.9601
		1.0327	1.2323	1.0261	0.6853	1.0691
		1.0861	0.9542	1.0255	0.7761	0.6047
		1.0721	0.947	0.9753	0.8012	0.5358
		1.0927	0.7584	0.8489	0.6274	0.9958
		1.0227	0.9874	0.9665	1.203	2.1938
		0.9755	1.0667	0.7144	1.037	0.926
		1.083	0.9671	1.2158	1.2358	1.6605
		1.0528	0.8813	1.2075	1.0278	1.0961
		0.9679	1.056	0.6706	1.1414	1.1531
		0.9577	1.1117	1.0611	1.1206	0.9639
		1.072	0.8165	1.2761	1.028	1.0687
		1.0423	1.2671	1.09	1.0603	1.2736
		1.1854	1.1344	1.0094	1.1289	1.468
		1.0283	1.0834	1.2319	0.7575	0.9353
		1.0909	1.1086	0.7259	1.0525	0.8002
		1.0343	0.8658	1.0612	1.1013	1.3141
		1.0736	1.1309	1.0778	1.0155	0.547
		0.9015	1.0864	1.1573	1.0768	1.3756
		1.016	1.0534	1.0096	0.7545	0.9115
		0.8148	1.3922	1.019	1.2353	0.9722
		1.0634	0.7954	1.3268	0.5914	1.145
		0.9215	0.9056	0.8494	0.8777	0.5887
		0.944	1.2842	1.0535	1.3055	1.0794
		0.8629	0.8351	0.7745	1.2107	0.7407
		1.0301	0.9889	1.0283	1.0662	0.6702
		0.8248	0.8959	0.8175	1.0977	0.6079
		0.7644	1.2093	0.969	1.025	0.8329
		0.9119	0.835	0.7795	0.8342	0.872
		0.9595	0.8233	0.7414	0.9971	0.6875
		0.9854	0.9177	1.2552	1.1283	0.9104
	40 Hz stim.
		1.0132	1.0803	1.8356	0.5994	0.9704
		1.02	1.1824	1.3794	0.8722	0.9292
		0.9454	1.1763	1.4218	0.904	1.1797
		0.8618	1.1164	1.6641	0.7151	0.7656
		0.7469	1.1229	1.5275	0.7618	1.0022
		0.8488	1.0953	1.2199	0.9523	0.4651
		1.0178	1.1028	1.2016	0.9488	1.1278
		0.7792	0.8959	1.6923	0.5975	0.2969
		0.7337	0.8469	1.3466	0.2124	0.7965
		0.5235	0.9679	1.4649	0.6692	0.5763
		0.7245	0.6728	1.648	0.648	0.6395
		0.2968	1.1741	1.4174	0.6575	0.2454
		0.6952	0.8764	1.2224	0.2882	0.9812
		0.4407	0.9322	0.9219	0.4842	0.7327
		0.6962	0.9542	1.1746	0.5202	1.0067
		0.5557	0.8239	0.9417	0.4325	0.6207
		0.3968	0.9552	1.2406	0.4762	0.8485
		0.3874	0.8306	1.4074	0.5606	0.5031
		0.4112	0.8877	1.424	0.2079	0.684
		0.7352	0.6203	1.256	0.2778	0.4476
		0.7201	1.1226	0.9099	0.5452	0.4806
		0.5794	0.7403	1.3368	0.6358	0.6903
		0.7889	0.8335	1.2379	0.8122	0.7764
		0.5056	0.6799	1.0524	0.5594	0.622
		0.3469	0.8511	0.7693	0.3386	0.6438
		0.4202	0.7785	0.8301	0.6103	0.1666
		0.4748	0.6909	0.9619	0.2664	0.8107
		0.7531	0.64	1.2124	0.5761	0.6513
		0.6318	0.6675	0.7485	0.2168	0.6384
		0.6055	0.5228	0.9085	0.6643	0.5945
		0.5839	0.8062	0.8572	0.5667	0.6639
		0.6029	0.6387	0.9247	0.2204	0.6417
		0.458	0.5525	1.129	0.4777	0.45
		0.3235	0.7781	1.0965	0.4247	0.6564
		0.6656	0.8981	1.2181	0.3679	1.2625
		0.6221	0.871	1.1712	0.5899	0.8393
		0.5123	0.7585	0.7272	0.3062	0.5188
		0.4726	0.6954	0.942	0.4168	0.4721
		0.2351	0.5536	1.1112	0.6271	0.4613
		0.7027	0.9746	0.615	0.6225	0.4064
		0.4284	0.914	0.9685	0.3303	0.709
		0.0343	0.1725	0.6867	0.1728	0.4909
		0.5824	0.2278	0.7934	0.59	1.4375
		0.2885	0.5308	0.9407	0.3428	0.523
		0.6305	0.6331	1.1141	0.5791	0.5803
		0.1708	0.5412	0.4729	0.3298	0.3218
		0.3736	0.7466	0.9708	0.4186	0.4815
		0.5849	0.4091	0.7409	0.2297	0.7727
		0.5792	0.3461	1.272	0.4049	1.1896
		0.488	0.5197	0.8372	0.691	0.5069
		0.553	0.7344	0.8983	0.5739	0.6288
		0.4466	0.6464	0.8722	0.8186	0.5405
		0.2502	0.557	1.0689	0.4666	0.6526
		0.5544	0.7631	1.0031	0.3645	0.592
		0.6806	0.5495	0.4797	0.7378	0.3395
		0.495	0.6582	1.0002	0.6459	0.5082
		0.3636	0.3358	0.5855	0.5476	0.462
		0.4875	0.5999	0.7378	0.5036	0.5806
		0.4264	0.6406	0.9696	0.4528	0.388
		0.4982	0.7824	0.8833	0.7596	0.4573
		0.317	0.569	0.6396	0.518	-0.07
		0.5547	0.538	0.7092	0.3954	0.3193
		0.3999	0.6554	0.8499	0.5723	0.2129
		0.5275	0.534	0.7759	0.8085	0.5538
		0.4235	0.5661	0.8877	0.6143	0.5027
		0.5381	0.6415	1.0214	0.9331	0.5561
		0.3443	0.7735	0.6563	0.4826	0.1217
		0.4085	0.7588	0.7798	0.8757	0.721
		0.4784	0.4665	1.0864	0.8876	0.696
		0.3132	0.5871	0.7786	0.5105	0.0806
		0.453	0.672	0.4909	0.5332	0.5614
		0.3291	0.7653	0.6423	0.3522	0.3876
		0.1865	0.4047	0.9556	0.7951	0.5388
		0.4069	0.7394	0.8047	0.592	0.4005
		0.1123	0.4465	0.7342	0.7977	0.4649
		0.3872	0.7111	0.8483	0.7529	-0.0609
		0.4696	0.321	1.0979	0.8429	0.4306
		0.4688	0.5646	1.0021	0.7777	0.3308
		0.1542	0.5424	0.7787	0.6713	0.4202
		0.5306	0.5684	0.6255	0.7131	-0.07
		0.33	0.7207	1.06	0.5729	0.2132
		0.3542	0.3955	0.8923	1.0606	0.473
		0.5793	0.7045	1.0273	0.6437	0.077
		0.4664	0.5067	0.7051	0.4807	0.6603
		0.2907	0.6566	0.7646	0.7493	0.2773
		0.2325	0.6045	0.7311	0.3383	0.5089
		0.3604	0.9948	0.6882	0.4383	0.0411
		0.3672	0.4865	0.8609	0.5331	0.3775
		0.2856	0.7534	0.6776	0.8575	0.2045
		0.4881	0.5483	0.6934	0.5109	0.2872
		0.3865	0.7591	0.917	0.4823	0.3292
		0.378	0.8536	0.7831	0.5182	0.199
		0.3097	0.3419	0.78	0.8517	0.1239
		0.2323	0.3791	0.4552	0.7422	0.3006
		0.3118	0.6262	0.4129	0.4287	0.9785
		0.1761	0.8782	1.1945	0.4495	0.2931
		0.2238	0.4351	0.6748	0.7304	0.5811
		0.3672	0.4254	0.5605	0.6059	0.4943
		0.6641	0.5031	0.6765	0.4153	0.1196
		0.5274	0.6586	0.8067	0.654	0.0946
		0.5058	0.6802	0.8282	0.4814	0.4367
		0.3006	0.7507	0.9606	0.6048	0.2293
		0.3467	0.3533	0.4076	0.9266	0.0264
		0.4189	0.608	0.8221	0.6877	0.2173
		0.5382	0.3361	1.0381	0.9201	0.2112
		0.1699	0.4455	0.8008	0.779	0.2536
		0.1417	0.774	0.5822	0.696	0.3109
		0.4836	0.464	0.4929	0.8188	0.1884
		0.1929	0.3592	0.694	0.8016	0.2313
		0.4326	0.5043	0.7311	0.6066	0.2828
		0.2536	0.5408	0.6369	0.7434	0.2132
		0.4894	0.5619	0.7665	0.6531	0.0224
		0.5877	0.3896	0.78	0.9174	0.1563
		0.3177	0.5877	0.6065	0.7059	0.3685
		0.3208	0.6831	0.7417	0.643	-0.07
		0.2094	0.6308	1.2302	0.7836	0.1228
		0.4323	0.6668	1.1605	0.814	0.2616
		0.4063	0.6399	0.4836	0.7173	0.5561
		0.1554	0.569	0.7341	0.7589	0.291
		0.2476	0.1338	0.5709	0.8927	0.1721
		0.1413	0.5277	0.8682	0.7429	0.2783
		0.3057	0.61	0.5336	0.7666	0.5054
		0.3712	0.5771	0.6621	0.3089	0.2125
		0.2268	0.5595	0.7554	0.4829	0.3257
		0.515	0.5288	0.6751	0.754	0.1436
		0.6733	0.37	0.5372	0.6182	0.5143
		0.1768	0.5022	0.6522	0.4757	-0.0007
		0.3647	0.6501	0.6747	0.4084	0.2007
		0.4059	0.4438	0.5576	0.5159	0.1593
		0.2934	0.6494	0.4608	0.8486	0.2042
		0.0985	0.2729	0.6339	0.7477	0.1593
		0.4074	0.6297	0.3988	0.5844	0.3023
		0.482	0.3148	0.6694	0.7234	0.5583
		0.5903	0.5717	0.5298	0.8127	0.3889
		0.2717	0.5846	0.887	0.63	0.2667
		0.4875	0.4243	0.8035	0.6047	0.3793
		0.2712	0.5432	0.8104	0.8261	0.453
		0.3766	0.5663	0.9832	0.6926	-0.07
		0.2444	0.5692	0.835	0.5756	0.5009
		0.2563	0.2568	0.7886	0.5122	-0.0235
		0.3136	0.5414	0.5526	0.6118	-0.07
		0.4224	0.2956	0.8512	0.8148	0.0348
		0.293	0.4133	0.5706	0.8286	0.0964
		0.385	0.3051	0.629	0.792	-0.07
		0.306	0.3661	0.6863	0.5143	-0.07
		0.2046	0.357	0.579	0.9676	0.0443
		0.4896	0.2882	0.4219	0.8947	0.146
		0.3525	0.4702	0.7044	0.5894	0.0218
		0.3007	0.3293	0.3353	0.7237	-0.0256
		0.4322	0.4182	0.7422	0.5683	0.2567
		0.3551	0.274	0.6569	0.4846	0.2337
		0.4017	0.1764	0.5359	0.8708	0.3013

## Sheet: Data Fig2A4
		Raw EPSP amplitude (mV), no binning, interval 10 s, baseline preceding 40 Hz burst is 5 min (30 stimulation cycles). na = EPSP amplitude not available due to spiking
		Cell
		15.1472
		12.2459
		na
		23.6255
		18.749
		9.3498
		15.0876
		na
		na
		na
		9.9566
		17.9455
		18.8649
		21.3661
		11.5218
		15.8891
		18.2456
		18.2754
		16.4249
		7.3922
		19.1054
		13.004
		20.4309
		11.2002
		16.3535
		15.2607
		12.3322
		16.3261
		18.0877
		17.667
		18.8026
		13.381
		24.7424
	40 Hz stim.
		19.9497
		18.7625
		18.9143
		na
		na
		na
		na
		20.8085
		na
		na
		26.4405
		18.6063
		26.4517
		26.9127
		na
		24.2741
		24.6567
		na
		19.6157
		15.1371
		24.0507
		21.5469
		25.4889
		na
		19.0095
		18.4953
		22.5184
		19.7463
		19.4024
		30.4062
		19.9154
		21.3614
		13.7464
		21.4389
		19.7078
		25.9163
		23.9332
		19.3485
		16.8717
		14.8943
		20.7531
		16.3271
		18.9101
		15.9924
		18.0886
		18.9514
		17.5683
		17.8453
		17.8651
		18.2107
		17.3358
		14.0774
		14.7963
		17.5014
		16.9834
		20.8898
		11.6845
		11.8557
		19.0038
		18.6824
		21.4128
		13.2428
		19.3534
		16.3853
		13.4488
		14.9441
		14.6815
		17.557
		13.7445
		10.7888
		14.7298
		17.3774
		13.5068
		14.8066
		13.8055
		10.6862
		15.7094
		24.5956
		11.7447
		13.8056
		19.8786
		17.0102
		11.2911
		10.8428
		16.2012
		14.0961
		6.7256
		16.6983
		11.9559
		10.8116
		8.2002
		15.9884
		9.2712
		8.4235
		11.5648
		13.2552
		18.9107
		15.5387
		11.3527
		13.5216
		15.2826
		10.8622
		17.3625
		14.9891
		15.3115
		14.05
		14.1194
		14.5481
		12.0626
		9.7956
		12.8868
		10.8438
		16.3442
		14.791
		12.8068
		13.8509
		10.9582
		14.0938
		10.8553
		18.4658
		12.0054
		13.942
		12.8326

## Sheet: Data Fig2A5
		bl-normalized EPSP, 30 s binning, baseline preceding 40 Hz burst is 5 min. Values missing indicate absence of EPSP amplitude value due to spiking
		Cell 1	Cell 2	Cell 3	Cell 4
		1.1585	1.0939	0.7509	0.8348
		0.973	0.9064	1.1601	1.8377
		0.9089	1.0505	0.9105	0.621
		0.9999	0.6952	0.8393	1.2362
		1.0413	1.0965	1.0477	1.1586
		0.8057	0.9722	0.8538	1.0064
		1.2598	1.0994	0.9321	1.0999
		0.9288	0.7755	0.9941	0.5167
		0.895	1.2456	1.3846	1.0216
		1.234	0.974	1.1269	0.9672
	40 Hz stim.
		2.3199	1.6828		1.0855
		2.3767	1.4521	1.2448	0.9153
		2.082	1.4148	1.4257	1.0182
		1.8435	1.5937	1.5311	1.0315
		1.8212	1.4008	1.3243	0.9104
		1.9118	0.7661	1.2111	1.4518
		1.6506	1.542	1.331	1.2364
		1.574	0.8453	1.2115	1.2207
		1.6342	1.2586	1.3904	1.0191
		1.7422	1.4708	1.1276	0.294
		1.5337	1.0451	1.3871	1.0812
		1.6406	1.308	1.0193	0.9046
		1.3928	1.2066	1.1165	0.8584
		1.5634	1.255	1.0575	0.5288
		1.5391	0.5316	1.0624	1.1413
		1.46	1.2075	0.9896	0.5235
		1.5372	1.4967	0.9828	0.6409
		1.4711	1.0907	0.886	0.6337
		1.387	1.4255	1.1785	0.8513
		1.5877	0.911	1.1502	1.006
		1.5117	1.0253	0.9768	0.7157
		1.49	1.3481	0.8589	0.7402
		1.5578	1.2532	0.8393	0.5543
		1.3955	1.3795	0.9096	0.7648
		1.8454	1.4034	0.7836	0.4495
		1.4642	1.5795	1.038	0.7005
		1.6478	1.389	1.0109	0.5994
		1.4399	1.5022	0.7645	0.9676
		1.3844	1.5143	0.7481	1.0544
		1.4827	1.4063	0.6176	0.5765
		1.3527	1.2304	0.6717	0.8216
		1.2517	1.4098	0.872	0.8608
		0.9999	1.4289	0.8059	0.4094
		1.4942	1.6901	0.8676	0.4774
		1.2967	1.4575	0.8844	0.8076
		1.2246	1.3365	0.8122	0.3112
		1.5298	1.3914	0.6685	0.5696
		1.4151	1.2695	0.8762	0.3599
		1.0976	1.3626	0.5918	0.3054
		1.5374	1.2145	0.6216	0.6919
		1.1974	1.5198	0.8241	0.7386
		1.5202	1.3209	0.5787	1.1885
		1.3008	0.9832	0.643	0.464
		1.297	1.3037	0.9081	0.2616
		1.1357	1.009		0.8836
		1.3562	1.1437		0.418
		1.3225	1.3568		0.5263
		1.6442	1.2809		0.8167
		1.2786	1.016
		1.298	1.405
		1.2417
		1.3687
		1.296
		1.4169
		1.4774
		1.1566
		1.2927
		1.188
		1.3344
		1.2365
