# Supplementary material for: Plasticity in Single Axon Glutamatergic Connection to GABAergic Interneurons Regulates Complex Events in the Human Neocortex
Source: PLoS Biol. 2016 Nov 9;14(11):e2000237. doi: 10.1371/journal.pbio.2000237 (PMC5102409; doi:10.1371/journal.pbio.2000237)
Supplement: S5 Data — (XLSX) [file pbio.2000237.s011.xlsx]

## Sheet: Data Fig 3C2
control	time (min)	cell1	cell2	cell3	cell4	cell5	cell6	cell7			LY+MPEP	time (min)	cell1	cell2	cell3	cell4	cell5	cell6	cell7
	-5	1.34291	0.688799	0.98622	1.5867	1.03449	1.11281	0.909829				-5	0.725407	0.663155		0.768843		0.982444	0.844628
	-4.75	1.02451	1.40091	0.727998	1.17049	0.448734	1.24923	1.02908				-4.75	0.477052	0.838194		1.04323	1.0337	0.903749	1.07424
	-4.5	1.07252	0.375932	0.739128	1.46225	-0.12327	0.599257	0.967836				-4.5	0.970225	0.647847		0.561354	0.555788	0.885341	0.72394
	-4.25	0.839633	1.75033	1.21363	1.35666	0.867825	1.12766	1.04559				-4.25	0.73336	0.966136	1.67208	1.13169	0.727443	0.881715	0.964418
	-4	0.355899	0.763541	1.31104	1.14483	0.0117554	0.630847	0.82269				-4	0.990013	0.868994		0.971594	1.76172	1.00381	0.584678
	-3.75	0.848309	0.596453	0.898642	1.36437	3.07674	0.836399	0.895624				-3.75	0.875353	0.665514	2.2771	1.0069	0.8161	0.849642	0.822779
	-3.5	1.04199	1.7962	2.03878	0.318572	0.621684	1.05389	1.39438				-3.5	0.854991	0.964447	1.29876	1.33597	1.07231	1.25821	0.980418
	-3.25	1.21401	1.44552	0.995522	0.301723	1.67895	0.964315	1.27646				-3.25	1.03814	0.84484		1.11431	2.79568	1.11824	0.986261
	-3	1.03603	0.337394	1.06016	0.458161	0.344072	1.50628	0.94454				-3	1.00486	1.17865	1.12301	1.27296	0.906695	0.87237	0.988388
	-2.75	0.805274	0.66162	0.857631	0.649146	0.185505	0.717708	0.58238				-2.75	1.0512	0.923471		1.62703	0.630372	0.826645	0.920449
	-2.5	0.383955	1.45772	1.57546	1.37818	1.23051	1.34067	1.18929				-2.5	1.06082	0.940431	2.16183	1.2008		0.984913	1.09841
	-2.25	1.14472	0.982116	0.458685	1.03295	1.58093	1.15216	1.23985				-2.25	0.856124	0.826455		0.863736	0.681889	0.977095	1.0196
	-2	1.00346	1.53494	1.168	0.690612	0.923929	0.933123	1.04963				-2	1.12351	1.08188		0.822499	0.63694	0.903025	1.16111
	-1.75	1.22781	0.977625	0.647396	0.864044	1.47566	0.852175	0.986445				-1.75	0.992531	1.29629	2.40351	0.685713	0.727626	0.935981	1.36453
	-1.5	1.13018	0.896308	0.537738	1.2172	1.77362	0.721938	0.863672				-1.5	0.98078	1.19215	1.27872	0.871262	0.880465	1.01601	1.06364
	-1.25	1.13122	1.10483	0.771652	0.603067	0.326309	0.888285	0.533281				-1.25	1.10182	1.06708	1.41324	1.10562	1.03638	1.19696	1.20823
	-1	1.09256		0.958418	0.724239			1.00922				-1	1.21209	1.3785	2.05709	0.954246	0.631122	0.797641	1.0844
	-0.75	1.16657	1.16517	0.940783	1.05746	1.5241	0.776281	1.15352				-0.75	1.24196	1.33478	1.85832	0.683772	1.18674	1.10328	1.27483
	-0.5	0.915041	0.491994	1.06423	1.3337	0.645426	1.28775	1.04926				-0.5	1.43489	1.2987	2.45635	0.660207	0.899968	1.19231	0.999103
	-0.25	1.19988	0.5726	1.19383	1.4242	1.32118	1.19667	1.01516				-0.25	1.27487	1.02248	0	1.31826	1.01906	1.31061	0.835962
	0											0
	0.25	1.46278	0.297842	0.679241	1.82774	0.765607	0.372962	1.05603				0.25	1.54321	1.01984	0.82559	0.995183	0.485652	1.0871	1.11792
	0.5	1.13461	0.485777	1.14594	1.19939	1.00605	0.532551	0.953784				0.5	1.32899	0.551223	2.95217	0.70203	0.840207	0.712221	0.701328
	0.75	0.896724	0.572533	1.06491	1.83302	2.67979	0.766515	0.767412				0.75	1.35947	0.914551	2.04511	0.865854	0.628596	1.07402	0.802822
	1	1.29783	0.371924	1.12466	2.01273	0.848863	0.31398	1.13108				1	1.52788	0.866964	2.85196	0.999697	0.711426	1.09858	1.06303
	1.25	1.12523	0.792092	0.729058	1.59553	0.957858	0.317381	0.675353				1.25	1.39815	1.00254	2.04309	1.26563	0.788076	1.14321	0.82098
	1.5	1.13239	0.761273	0.615316	1.39027	0.471922	0.343042	1.32505				1.5	1.30648	1.01121	3.24864	0.717475	0.475986	0.712583	0.891593
	1.75	1.22447	0.738278	1.05479	1.61277	1.2601	0.581745	1.28338				1.75	1.39927	0.904553		0.72467	0.582419	0.618549	1.2969
	2	1.06948	0.446048	0.953544	1.45668	2.26113	0.258338	1.03331				2	1.37249	0.94262	2.29642	0.450137	0.733574	0.284563	0.949831
	2.25	0.962152	0.682391	0.585945	1.04261	1.74685	0.399323	0.951156				2.25	1.60836	0.927213	1.53522	0.683456	0.62768	0.488193	1.11134
	2.5	0.854092	0.633428	1.01066	1.30478	1.24363	0.661023	1.02457				2.5	1.45503	1.02669	1.1963	0.642465	0.694044	0.568553	1.08588
	2.75	0.891116	1.06716	1.20989	1.92408	1.36426	1.0634	0.811103				2.75	1.47915	0.867282	2.03471	0.684912	0.600821	0.650724	1.17083
	3	0.825307	0.554545	0.925724	1.36293	3.09399	0.742081	1.07489				3	1.49755	1.00179	2.34507	0.635956	1.00183	0.956668	1.02739
	3.25	1.06454	1.04378	1.07518	0.568611	0.791607	0.611851	0.531232				3.25	1.38872	0.80276	1.84361	0.43614	0.919598	0.625563	0.98368
	3.5	0.993662	0.957699	0.86746	0.913421	1.04686	0.686314	0.724949				3.5	1.53967	0.887302	2.36163	0.697477	0.506777	1.32165	0.967452
	3.75	0.722752	1.02438	1.16651	0.85152	1.463	1.01526	1.33068				3.75	1.21716	1.31609	1.3604	0.540508	0.67867	0.490176	1.15353
	4	0.983644	0.722687	0.61341	0.920413	0.378386	0.7476	0.89677				4	1.44692	1.11944	2.0065	0.982826	0.371616	0.523502	0.999903
	4.25	0.839045	1.14164	0.71729	0.967321	1.10891	0.755172	1.33152				4.25	1.46284	1.1066	2.82753	0.933515	0.834233	0.817279	1.00547
	4.5	0.821273	0.404041	0.616001	1.95569	0.619502	0.979103	0.898049				4.5	1.35045	0.842336	2.82472	0.612229	1.14647	0.803258	1.11695
	4.75	0.679884	0.40509	0.680042	1.4461	2.64919	0.577831	0.989347				4.75	1.28359	0.880049	2.54563	1.1548		0.52888	1.12101
	5	0.949628	1.0301	1.13278	1.32754	0.798077	0.848774	0.792697				5	1.43758	1.04152	2.96045	0.723708	1.66849	0.85646	0.985347
	5.25	0.870856	1.00079	0.614722	1.0298	1.04419	0.781985	1.04512				5.25	1.52301	1.04176	2.94722	1.0886	2.10862	1.0691	0.863284
	5.5	0.442656	1.18488	0.660888	1.09554	0.107935	0.680823	1.18408				5.5	1.43462	0.749619	2.88062	1.21202	0.343768	0.593309	1.25307
	5.75	1.12589	1.15815	0.706757	1.12275	0.391601	0.601097	1.21916				5.75	1.45331	1.08643		1.39029	0.792964	0.700987	1.18007
	6	0.943192	0.700828	1.03209	1.13376	1.4679	0.794792	1.19822				6	1.52627	1.23198	3.034	1.05817	0.427711	0.380471	0.96953
	6.25	1.44492	0.686386	0.88255	2.0783	0.853212	0.920257	1.11811				6.25	1.43046	0.825818	2.70979	1.89495	0.951693	0.546281	0.990444
	6.5	0.883685	0.50625	0.825598	1.24434	1.78934	0.70143	0.813041				6.5	1.40194	0.965262	2.47026	1.25166	0.324398	0.549936	0.88069
	6.75	1.08466	0.862983	0.461431	1.73449	1.60453	0.425432	1.04858				6.75	1.48956	1.22253	1.67161	1.00454	0.559256	0.925413	1.16147
	7	0.971913	1.19315	0.859731	1.20359	0.763133	0.993891	0.846038				7	1.53194	1.17857	2.39355	0.832552	0.281872	0.550001	0.991439
	7.25	1.01796	0.223755	0.755657	1.22606	1.33302	0.934275	0.945748				7.25	1.48415	1.02965	0.665489	1.04039	1.244	0.667821	1.31003
	7.5	1.04782	0.653382	0.76484	1.65691	0.0922914	0.702199	0.606884				7.5	1.15709	1.039	3.12679	1.13067	0.619706	0.347406	1.25022
	7.75	0.986132	0.488836	0.98844	1.32469	1.47178	0.634734	0.945311				7.75	1.45822	0.99139		1.15685	1.71996	0.988981	1.22179
	8	1.02466	0.776501	0.812008	0.958725	1.64526	0.974474	1.26253				8	1.34225	0.958022	3.1685	1.07175		1.04142	0.898782
	8.25	1.01066	0.943676	0.863163	1.20449	1.71647	0.735498	0.895583				8.25	1.20492	1.01974	1.6601	1.31028	0.620109	0.729173	1.26629
	8.5	0.947324	0.850246	1.23545	1.1451	0.421673	0.769943	0.690999				8.5	1.44525	1.05526	2.48281	1.10228	0.318557	0.606736	1.19523
	8.75	0.984043	0.953504	0.921142	0.681151	0.464746	0.900239	0.988789				8.75	1.38646	0.970803	2.49424	1.2087	1.54134	0.497197	1.08849
	9	0.352003	0.591851	0.871816	0.972529	1.18044	0.649931	0.605778				9	1.3328	1.0948	3.00223	1.22217	0.819931	0.571224	1.063
	9.25	1.06564	0.093062	0.816893	0.457567	0.44646	0.87276	0.960744				9.25	1.53144	1.19892	2.35881	1.16271	0.398113	0.86047	0.980682
	9.5	0.877476	1.14852	1.06442	0.242128	0.656136	0.851208	1.01942				9.5	1.0863	1.30935	2.00218	1.27355	0.911424	0.513527	1.0307
	9.75	0.80242	1.1382	0.851369	0.972349	0.573664	0.704601	0.492725				9.75	1.18135	1.10688	2.54162	0.763065	0.639148	0.494671	0.877847
	10	0.864017	1.04983	0.49097	1.05577	1.56877	0.884267	0.926733				10	1.11214	1.30892	2.4968	1.31242	0.803653	0.887889	1.05068
	10.25	0.582689	0.447191	0.350506	1.44489	1.56617	0.540755	0.712134				10.25	1.18452	1.10509	2.61399	1.2245	1.07642	0.691374	1.2849
	10.5	0.931547	0.525162	0.526648	2.85846	0.348667	0.61726	0.992645				10.5	1.43146	0.993988	2.29424	0.572848	0.784315	0.870517	1.05568
	10.75	0.527631	0.54729	0.874265	0.478272	0.704172	0.712047	1.3366				10.75	1.45816	1.22816	2.04595	0.468271	1.63445	0.708124	1.01575
	11	0.942947	0.665327	0.787658	1.75647	1.73673	0.738348	0.8635				11	1.31175	1.11432	2.06427	0.978427		0.530335	0.89412
	11.25	0.401869	0.460646	0.504637	1.20094	1.30815	0.500857	0.682668				11.25	1.48595	1.16165	2.31047	0.646679	0.606644	0.563002	1.04933
	11.5	0.920027	0.0868371	0.790896	1.19761	1.33929	0.748605	0.582137				11.5	1.41984	1.23476	2.01175	0.481067	1.82218		1.10138
	11.75	0.785545	0.85923	0.76778	1.2263	1.38353	0.647049	0.527873				11.75	1.36413	1.15503	2.80655	0.679134	0.442676		0.966098
	12	0.611217	0.917665	0.598973	0.451439	1.01405	0.669283	0.425008				12	1.34847	1.23122		0.598986	0.43157		1.19758
	12.25	0.605373	0.944525	0.679829	1.49203	1.48644	0.785255	0.72642				12.25	1.35707	0.831375		0.922237	0.663024		0.886964
	12.5	0.302721	0.92665	1.09534	0.844816	1.18058	0.728533	1.0885				12.5	1.30832	1.12253	2.29899	0.358942	1.1703		1.10944
	12.75	0.998253	0.690195	0.55556	1.34518	1.51974	0.788651	1.0828				12.75	1.40623	1.23308	2.22972	0.724694	0.394486		1.11384
	13	0.681236	0.812371	0.750332	1.55507	1.83255	0.727212	0.971012				13	1.29911	1.23923	1.57319	0.425863	0.767002		1.16318
	13.25	0.774789	0.973802	0.965396	0.755397	0.876677	0.94891	1.0373				13.25	1.4639	0.906207		1.23881	0.27934		1.08422
	13.5	0.30161	0.99764	0.401571	0.598327	0.677772	1.01084	1.03198				13.5	1.16116	0.871231	1.56075	0.716297	0.774156		1.01866
	13.75	0.636931	0.449714	0.677599	0.189759	1.75498	0.840269	0.529567				13.75	1.33974	0.864269	0.504385	0.792154	0.25317		1.33129
	14	0.203393	1.34513	0.85588	1.01837	1.30977	0.781292	0.990463				14	1.51194	0.747083	2.65599	0.599433	1.26373		0.923913
	14.25	0.663344	0.87153	0.332851	1.05198	0.743787	0.80483	1.13651				14.25	1.2067	0.922265	2.18633	0.522605	0.305675		1.10241
	14.5	0.708254	0.751739	0.871189	1.93612	1.62953	0.760745	0.889049				14.5	1.51765	0.664648	0.712438	0.675491	0.530084		0.854467
	14.75	0.534956	1.03357	0.599199	0.424372	0.224536	0.593553	0.426641				14.75	1.45666	0.991022	2.61846	0.668195			1.20221
	15	0.686925	0.502885	0.9269	1.22363	2.33462	0.811605	1.24778				15	1.32676	0.988276		1.0404	1.5754		1.09388
	15.25	0.49114	0.829429	0.967599	-0.085689	0.919918	0.60244	0.7846				15.25	1.30885	0.877504	2.34179	0.517474	0.837915		1.03549
	15.5	0.570194	1.16776	0.68644	0.931766	0.443217	0.714105	0.828687				15.5	1.43776	0.698097	2.21582	0.976825	1.20886		1.12645
	15.75	0.628753	0.21206	0.924535	0.284783	0.307961	0.572662	0.840822				15.75	1.57143	0.982802	1.1781	1.07153	0.879598		0.912188
	16	0.555512	0.338857	1.27768	-0.0309057	0.664526	0.774747	1.04571				16	1.30606	1.07413	1.8651	1.05995	1.1353		0.961131
	16.25	0.55292	0.363513	0.726712	1.03742	1.27911	0.669747	0.793671				16.25	1.44715	1.04845	2.53713	0.653582	0.833329		0.877932
	16.5	0.412334	0.0750178	0.507267	0.432085	1.09325	0.883967	0.639566				16.5	1.51675	1.0856	2.3308	1.02517	0.331544		0.980291
	16.75	0.384835	0.789432	0.694711	0.569314	0.246233	0.657388	0.845246				16.75	1.67209	1.10088	1.95598	0.702515	0.663954		1.08072
	17	0.588902	0.862833	0.571974	1.01118	1.00778	0.81071	1.12824				17	1.33823	1.11906	2.2591	0.71709	0.554586		0.979368
	17.25	0.377395	0.498764	0.438205	0.415506	2.42346	0.842725	0.921507				17.25	1.29244	1.15316	0	0.676554	0.362382		0.972346
	17.5	0.617614	1.01181	0.729601	0.971989	1.07995	0.487373	0.956067				17.5	1.30871	0.971514	0	0.927175			1.08487
	17.75	0.573563	0.826919	0.608259	1.17514	0.15471	0.609056	0.910965				17.75	1.43755	1.22147	2.00869	0.820349			0.93453
	18	0.33155	0.882469	0.561227	0.454629	0.384148	0.859986	1.02046				18	1.45163	0.954064	2.24191	1.31131	0.341864		0.978387
	18.25	0.333498	1.34468	0.780097	0.151934	1.93917	0.882225	0.88359				18.25	1.43066	1.03756	1.90292	0.881932			1.15001
	18.5	0.45687	0.31274	0.442832	0.0786609	1.64301	0.6266	0.70081				18.5	1.24202	0.920275	0	1.27076	0.307451		0.901907
	18.75	0.604305	1.06535	0.408705	0.254868	1.65999	0.633085	0.823654				18.75	1.27084	1.01996	2.63617	0.833592	0.708294		0.969491
	19	0.545691	1.10734	0.840778	0.0694342	0.582838	0.715955	0.507286				19	1.31107	1.07785	0.704785	0.62031			1.09603
	19.25	0.552697	0.721557	0.5115	0.365426	1.06578	1.09566	0.471184				19.25	1.60952	1.22724	1.85681	0.765761			1.00768
	19.5	0.624372	0.777863	0.552826	1.15479	0.739054	0.449255	0.978673				19.5	1.32078	1.07329	1.98751	0.488925			1.10668
	19.75	0.521826	0.680636	0.5425	0.129137	0.915585	0.545035	0.749311				19.75	1.52278	0.993189	1.34683	0.824948			0.885209
	20	0.447963	0.68801	0.928503	0.346739	1.30407	0.569092	0.834947				20	1.40167	0.949733	1.97111	1.22171			0.823621

## Sheet: Data Fig 3C3
ctrl	time (min)	cell1	cell2	cell3	cell4	cell5			LY+MPEP	time (min)	cell1	cell2	cell3	cell4	cell5
	-5	1.63171	0.869814	0.806435		0.705106				-5	0.838757	1.25824	0.98187	1.42916	0.791981
	-4.75	1.71714	0.910217	1.02059	0.741465	0.695169				-4.75	0.874244	1.00874	0.9557	1.03861	0.974689
	-4.5	2.09508	1.0273	1.2023	0.595528	0.999208				-4.5	0.794292	1.47291	0.717811	0.670693	1.17192
	-4.25	1.38908	0.767791	0.982868	1.0266	0.731919				-4.25	0.867442	0.909387	1.21213	1.34723	1.09109
	-4	1.80644	1.1404	1.18481	0.786017	1.30731				-4	1.10603	0.777897	0.980176	0.892978	1.03402
	-3.75	1.61666	0.760979	1.06005	0.625923	1.24183				-3.75	0.837384	0.90972	0.959293	1.16636	0.848743
	-3.5	1.70931	0.911319	1.17878	0.727705	0.986139				-3.5	1.11371	0.979274	0.797012	1.0596	1.08002
	-3.25	0.6473	1.19733	0.997145	0.781511	0.74358				-3.25	1.28826	0.917534	0.948562	1.04723	0.80017
	-3	1.24526	1.13088	1.10954	0.982916	0.944608				-3	1.13483	0.945113	1.20741	1.02487	0.854583
	-2.75	0.800145	1.02631	0.713871	1.48491	1.36882				-2.75	1.09209	0.91777	0.99022	1.01398	1.21978
	-2.5	1.01121	0.761924	1.05519	1.42896	1.28558				-2.5	1.11985	0.878094	1.15171	0.875268	1.1057
	-2.25	0.464907	0.865711	1.02699	1.17206	1.03139				-2.25	1.15376	1.11518	1.11439	0.632119	1.24039
	-2	0.584532	1.01304	1.01774	1.51973	0.5854				-2	0.99611	1.03846	1.07557	0.69292	1.11371
	-1.75	0.638204	1.13136	0.725474	1.0988	1.09616				-1.75	0.924657	0.855376	1.34292	0.830479	0.817133
	-1.5	0.604644	1.06806	1.06844	1.10885	0.922502				-1.5	0.850975	0.849563	0.933977	0.958823	1.02512
	-1.25	0.746935	1.19274	1.06678	0.990773	1.11556				-1.25	0.845844	0.935875	1.10217	1.36786	0.863482
	-1	0.499975	1.20489	1.14156	0.985789	0.858954				-1	0.871834	1.05192	0.810978	0.891509	0.895061
	-0.75	0.458219	0.850709	0.906322	1.17698	0.804519				-0.75	0.867455	0.96117	0.894495	0.793855	0.789911
	-0.5	0.385214	1.06558	0.806442	0.906807	1.06862				-0.5	1.2363	0.979627	1.0078	1.07861	0.912241
	-0.25	0.579741	0.97347	0.735109	0.858673	1.21275				-0.25	1.09021	0.941367	0.965572	1.03618	1.2411
	0									0
	0.25	0.258928	1.52863	0.866977	0.709507	0.999343				0.25	2.8018	1.24212	0.716226	--	0.942168
	0.5	0.205634	1.50798	1.18653	0.565737	0.836083				0.5	2.66444	0.578002	0.967637	--	0.782179
	0.75	0.397462	1.32309	1.11525	0.649966	0.96772				0.75	1.4602	0.58944	0.814637	1.9575	0.71056
	1	0.289892	1.45607	0.632461	0.538047	1.41162				1	1.85121	0.51115	1.11383	1.59735	0.803695
	1.25	0.285451	1.384	1.05863	0.557801	0.734287				1.25	1.44351	0.601324	0.975205	1.18493	0.917209
	1.5	0.312861	1.43968	1.05849	0.481435	0.676825				1.5	1.1889	0.566665	1.12007	1.15296	0.944166
	1.75	0.3739	1.42056	1.20313	0.463817	0.807427				1.75	1.10712	0.59511	0.905597	1.22168	1.02433
	2	0.266237	1.20719	1.19568	0.435584	0.895344				2	1.33155	0.597885	0.631132	1.12654	0.966389
	2.25	0.246555	1.08452	1.03588	0.554451	0.765102				2.25	0.936447	0.693812	0.979044	1.15572	1.22157
	2.5	0.204154	0.952825	0.871563	0.353276	0.727648				2.5	1.02505	0.547267	1.49117	1.11631	1.11245
	2.75	0.284703	1.21186	1.0181	0.412853	0.941821				2.75	1.22996	0.606374	1.03647	1.10172	0.973705
	3	0.245932	0.99372	0.547514	0.357672	0.754731				3	0.678878	0.63128	1.0292	1.18154	0.707271
	3.25	0.28302	1.1839	0.672035	0.431976	1.10054				3.25	1.27714	0.513308	0.742556	0.801801	0.796134
	3.5	0.135916	1.01249	0.22557	0.516799	0.553717				3.5	1.14445	0.500295	1.00831	1.55293	0.988735
	3.75	0.233341	1.04137	0.671107	0.339102	0.621026				3.75	0.800964	0.522506	1.20951	0.668878	1.04775
	4	0.233933	0.855708	0.570585	0.424724	0.816015				4	0.824143	0.482813	1.08945	0.774308	1.03011
	4.25	0.205276	1.21985	0.689884	0.277867	0.721113				4.25	1.17383	0.547099	0.838004	0.864344	0.910385
	4.5	0.22544	1.12277	0.541342	0.269736	0.690509				4.5	0.698882	0.461978	0.450631	0.813871	1.22554
	4.75	0.199572	1.26022	0.236272	0.475592	0.702019				4.75	0.987572	0.57835	1.00898	1.11663	1.13689
	5	0.191719	0.931313	0.404198	0.363947	0.81441				5	1.38204	0.480779	1.00449	1.02088	1.30927
	5.25	0.275446	1.68212	0.158886	0.341437	0.552563				5.25	0.621767	0.382208	0.796316	1.16547	1.34105
	5.5	0.116826	1.0731	0.73837	0.360518	0.580094				5.5	0.819362	0.607004	0.783685	1.03152	0.853521
	5.75	0.358676	1.18191	0.69923	0.404191	0.773645				5.75	1.05665	0.477538	1.16152	0.927145	1.09816
	6	0.180997	1.07571	0.58891	0.284652	0.68285				6	0.700074	0.49422	1.26884	0.656521	1.17261
	6.25	0.247646	0.948167	0.547651	0.260311	0.716737				6.25	0.802078	0.519793	1.00433	1.11408	1.02476
	6.5	0.254487	0.900184	0.994699	0.202222	0.872248				6.5	0.924981	0.373495	0.986234	1.30475	0.960395
	6.75	0.102708	1.03126	0.643333	1.91977	0.550554				6.75	0.874128	0.450513	1.07117	0.731967	1.121
	7	0.088543	1.30689	0.815539	0.207886	0.578521				7	1.06216	0.418138	1.07644	1.08169	1.01665
	7.25	0.226952	1.24517	0.502427	1.93025	0.593165				7.25	0.746665	0.315929	0.68353	1.03012	1.19833
	7.5	0.051502	1.26879	0.974388	0.323629	1.06412				7.5	0.944143	0.43699	1.04476	1.05746	1.18103
	7.75	0.116889	1.25207	0.612352	0.279287	0.732939				7.75	0.799085	1.12761	1.08502	1.01073	0.986953
	8	0.15848	1.46443	0.897096	0.325974	1.40281				8	1.22245	0.367106	0.999508	1.27086	0.983541
	8.25	0.232577	1.19088	0.855644	0.217926	0.508514				8.25	1.12933	0.391821	0.77758	1.04993	1.00921
	8.5	0.15393	1.38432	0.799262	0.206051	0.451351				8.5	0.847619	0.352612	0.836047	0.531755	1.03131
	8.75	0.237813	0.779538	0.77436	0.309439	0.504287				8.75	0.919824	1.11386	1.0438	0.864293	0.830283
	9	0.263182	1.05505	0.976911	0.318396	0.643343				9	1.03681	0.450388	1.04086	0.983091	1.05193
	9.25	0.202798	1.08882	0.917445	0.257124	0.618883				9.25	1.40635	0.553311	1.05141	0.724824	0.944074
	9.5	0.151577	1.26504	0.77671	0.284625	0.667382				9.5	1.49192	0.369015	1.30926	0.878654	0.940385
	9.75	0.131552	0.973482	0.711876	0.24883	0.808132				9.75	0.893381	0.401504	1.00236	0.901539	1.24834
	10	0.125163	1.03416	0.922022	0.239274	0.702019				10	1.07003	1.04659	0.660796	1.05893	0.950436
	10.25	0.141183	1.25963	0.906574	0.347075	0.914288				10.25	1.0399	0.37462	0.947051	1.22222	1.04243
	10.5	0.193074	1.07671	0.574912	0.215397	0.722776				10.5	1.34576	1.41162	0.987867	0.643506	0.941492
	10.75	0.216823	1.03277	0.808448	0.255588	0.672688				10.75	0.956853	0.997355	1.00081	1.05462	0.897076
	11	0.070716	1.12853	0.748083	0.308655	0.978166				11	0.86029	0.800379	0.907394	1.17617	1.16148
	11.25	0.233405	1.17805	0.648258	0.306867	0.741392				11.25	0.86156	0.866842	0.711987	1.0904	1.00493
	11.5	0.305222	0.958561	1.03387	0.273639	1.10917				11.5	1.3383	0.980648	0.764056	0.873166	1.22535
	11.75	0.161588	1.23906	0.744076	0.490124	0.541232				11.75	0.969666	0.896633	0.773374	1.0007	0.956092
	12	0.287268	1.09125	0.498355	0.363894	3.45476				12	0.98625	1.14005	0.986968	0.659161	0.974043
	12.25	0.233405	1.26569	0.671013	0.426317	0.484264				12.25	1.12701	1.06423	0.580046	0.990909	0.910662
	12.5	0.287268	0.802575	0.537674	1.66245	0.477775				12.5	1.28997	1.18169	0.787892	0.919249	1.28738
	12.75	0.233405	0.98579	0.921612	0.242067	0.47755				12.75	1.32314	0.880093	0.663412	0.600251	1.06681
	13	0.359084	1.31654	0.503539	0.258234	0.508113				13	1.22989	0.45086	0.761988	0.847124	0.884781
	13.25	0.179542	1.39842	0.74023	0.212209	0.679331				13.25	1.10295	0.644446	0.844045	1.03338	1.12954
	13.5	0.305222	1.15579	0.386391	0.205009	0.521286				13.5	0.936032	0.863022	0.908016	1.09688	1.19007
	13.75	0.359084	0.876365	0.871779	0.240541	0.270468				13.75	1.59616	1.19629	1.01245	1.0786	0.803326
	14	0.0718169	0.980374	0.472655	0.243597	0.673958				14	1.05779	0.707143	1.10092	0.914769	1.00558
	14.25	0.34113	1.30244	0.70329	0.35348	0.663151				14.25	0.676079	0.689424	1.0471	0.881181	1.12819
	14.5	0.143634	1.04062	0.289548	0.23388	0.505808				14.5	0.810124	0.592226	0.88843	1.07703	0.873254
	14.75	0.0897711	0.761396	0.376463	0.32628	0.502871				14.75	0.955713	0.936712	1.05073	1.02622	0.946441
	15	0.269313	0.949146	0.31179	0.407028	0.501224				15	1.36216	1.02842	1.10429	0.816584	1.00709
	15.25	0.359084	1.15927	0.350208	0.26388	0.51308				15.25	0.544186	0.972525	1.0119	0.684832	0.782824
	15.5	0.269313	1.34865	0.273712	0.62078	0.716834				15.5	1.03855	0.605992	1.18224	0.911674	1.08642
	15.75	0.323176	1.00257	0.582017	0.31388	0.347291				15.75	0.967697	0.925354	1.03923	1.11793	1.19941
	16	0.197496	0.988402	0.495396	0.23828	0.406262				16	0.749865	1.02849	1.06703	0.941386	1.06871
	16.25	0.215451	1.00969	0.761812	0.36078	0.671844				16.25	0.901362	0.637339	0.815307	0.969064	1.07059
	16.5	0.215451	1.14701	0.563998	0.38078	0.687501				16.5	1.62173	0.936811	0.795422	0.780559	0.872855
	16.75	0.143634	0.726641	0.571987	0.389628	0.714825				16.75	1.17782	0.460199	1.13744	1.11306	1.00134
	17	0.233405	0.683365	0.67904	0.26388	0.446014				17	0.979746	0.811516	1.07947	0.588818	0.844177
	17.25	0.0538627	0.930024	0.252249	0.31998	0.799				17.25	0.78543	0.848999	1.17118	1.07071	0.796472
	17.5	0.143634	1.05544	0.474243	0.410703	0.851				17.5	1.27256	0.881155	1.17764	0.710921	0.801943
	17.75	0.359084	0.708174	0.845375	0.63348	0.575				17.75	1.24092	1.19471	1.22583	1.29592	0.755991
	18	0.34113	0.423365	0.737975	0.25628	0.312				18	0.833938	0.873814	0.915382	0.984163	0.971553
	18.25	0.269313	0.35757	0.866323	0.64638	0.492				18.25	0.777384	0.75756	0.805489	0.809525	1.06441
	18.5	0.179542	0.405907	0.588066	0.33948	0.702				18.5	1.01216	0.871323	0.666757	1.06326	1.08233
	18.75	0.359084	0.527714	0.589548	0.74228	0.258				18.75	1.1072	0.903668	0.665263	0.862249	1.1076
	19	0.0538627	0.319354	0.476463	0.60828	0.748				19	1.2451	0.679537	0.72256	1.41168	1.00954
	19.25	0.251359	0.779251	0.311179	0.638799	0.88				19.25	1.34475	0.720475	0.994323	1.19415	1.06346
	19.5	0.0718169	0.636138	0.350208	0.23388	0.599				19.5	1.32565	0.784644		1.30126	0.866277
	19.75	0.161588	0.473754	0.273712	0.22548	0.311				19.75	1.16769	0.682865		0.903041	0.763798
	20	0.269313	0.428639	0.382017	0.347987	0.808				20	1.22797	0.523953		1.33302	0.837261

## Sheet: Data Fig 3C4
	ctrl CV-2			LY MPEP CV-2
cell1	0.228321		cell1	1.19726
cell2	0.683721		cell2	1.40635
cell3	1.05043		cell3	1.19125
cell4	0.385093		cell4	0.472371
cell5	1.05531		cell5	2.1432
cell6	0.266129		cell6	1.01942
cell7	1.3672		cell7	1.04527

## Sheet: Data Fig 3C5
rat control		1/CV2 bl norm	LY+MPEP		1/CV2 bl norm
	cell1	0.679751		cell1	0.945004
	cell2	0.132006		cell2	0.696193
	cell3	0.28793		cell3	0.737523
	cell4	0.464258		cell4	1.80696
	cell5	0.483718		cell5	0.979764
